# Supplementary material
Source: MDPI journal article supplement (https://www.mdpi.com/1999-4907/7/2/42)
Supplement: s1 [file s1]

## Sheet: Table S1
Family	Genus	Species	Types	Native/Exotic	UPA	UPA_Frequency	BUA	BUA_Frequency
Myrtaceae	Eucalyptus	Eucalyptus robusta Sm.	tree	E	presence	13	absence	0
Araliaceae	Schefflera	Schefflera actinophylla (Endl.) Harms	tree	E	presence	2	presence	7
Arecaceae	Bismarckia	Bismarckia nobilis Hildebr. & H.Wendl.	tree	E	absence	0	presence	3
Magnoliaceae	Michelia	Michelia alba DC.	tree	E	presence	1	presence	16
Arecaceae	Areca	Areca catechu L.	tree	E	presence	8	presence	7
Moraceae	Artocarpus	Artocarpus heterophyllus Lam.	tree	E	presence	7	presence	15
Myrtaceae	Callistemon	Callistemon viminalis (Sol. ex Gaertn.) G.Don	tree	E	absence	0	presence	2
Lythraceae	Lagerstroemia	Lagerstroemia speciosa (L.) Pers.	tree	E	presence	2	presence	15
Meliaceae	Swietenia	Swietenia macrophylla King	tree	E	absence	0	presence	1
Leguminosae	Acacia	Acacia auriculiformis Benth.	tree	E	absence	0	presence	1
Bignoniaceae	Kigelia	Kigelia africana (Lam.) Benth.	tree	E	absence	0	presence	1
Arecaceae	Caryota	Caryota obtusa Griff.	tree	E	absence	0	presence	1
Annonaceae	Annona	Annona squamosa L.	tree	E	presence	1	absence	0
Caricaceae	Carica	Carica papaya L.	tree	E	presence	12	presence	15
Myrtaceae	Psidium	Psidium guajava L.	tree	E	presence	11	presence	2
Meliaceae	Khaya	Khaya senegalensis (Desv.) A.Juss.	tree	E	presence	4	presence	26
Leguminosae	Delonix	Delonix regia (Hook.) Raf.	tree	E	presence	3	presence	23
Leguminosae	Bauhinia	Bauhinia variegata L.	tree	E	absence	0	presence	1
Bombacaceae	Pachira	Pachira glabra Pasq.	tree	E	presence	6	presence	6
Bignoniaceae	Tabebuia	Tabebuia heterophylla (DC.) Britton	tree	E	absence	0	presence	2
Leguminosae	Bauhinia	Bauhinia blakeana Dunn	tree	E	presence	6	presence	12
Myrtaceae	Callistemon	Callistemon rigidus R.Br.	tree	E	absence	0	presence	1
Arecaceae	Wodyetia	Wodyetia bifurcata A.K.Irvine	tree	E	presence	3	presence	13
Moraceae	Ficus	Ficus elastica ‘Variegata'	tree	E	absence	0	presence	1
Arecaceae	Syagrus	Syagrus romanzoffiana (Cham.) Glassman	tree	E	absence	0	presence	1
Bignoniaceae	Handroanthus	Handroanthus chrysanthus (Jacq.) S.O.Grose	tree	E	absence	0	presence	2
Leguminosae	Senna	Senna surattensis (Burm.f.) H.S.Irwin & Barneby	tree	E	presence	2	presence	10
Rutaceae	Clausena	Clausena lansium (Lour.) Skeels	tree	E	presence	4	presence	1
Bignoniaceae	Spathodea	Spathodea campanulata P.Beauv.	tree	E	presence	3	presence	9
Apocynaceae	Plumeria	Plumeria rubra‘Acutifolia’	tree	E	presence	3	presence	33
Leguminosae	Erythrina	Erythrina crista-galli L.	tree	E	presence	1	presence	11
Arecaceae	Archontophoenix	Archontophoenix alexandrae (F.Muell.) H.Wendl. & Drude	tree	E	absence	0	presence	10
Arecaceae	Hyophorbe	Hyophorbe lagenicaulis (L.H.Bailey) H.E.Moore	tree	E	presence	2	presence	6
Sapindaceae	Litchi	Litchi chinensis Sonn.	tree	E	presence	3	presence	3
Moraceae	Ficus	Ficus binnendijkii Miq.	tree	E	absence	0	presence	1
Sapindaceae	Dimocarpus	Dimocarpus longan Lour.	tree	E	presence	1	presence	4
Podocarpaceae	Podocarpus	Podocarpus macrophyllus (Thunb.) Sweet	tree	E	presence	1	absence	0
Leguminosae	Acacia	Acacia mangium Willd.	tree	E	absence	0	presence	2
Anacardiaceae	Mangifera	Mangifera indica L.	tree	E	presence	3	presence	12
Bombacaceae	Ceiba	Ceiba speciosa (A.St.-Hil.) Ravenna	tree	E	absence	0	presence	7
Moraceae	Artocarpus	Artocarpus altilis (Parkinson ex F.A.Zorn) Fosberg	tree	E	absence	0	presence	1
Casuarinaceae	Casuarina	Casuarina equisetifolia L.	tree	E	presence	26	presence	6
Araucariaceae	Araucaria	Araucaria cunninghamii Mudie	tree	E	presence	2	presence	5
Rosaceae	Eriobotrya	Eriobotrya japonica (Thunb.) Lindl.	tree	E	absence	0	presence	1
Moraceae	Ficus	Ficus religiosa L.	tree	E	absence	0	presence	4
Arecaceae	Livistona	Livistona chinensis (Jacq.) R.Br. ex Mart.	tree	E	presence	4	presence	23
Sapotaceae	Manilkara	Manilkara zapota (L.) P.Royen	tree	E	presence	2	presence	3
Lauraceae	Cinnamomum	Cinnamomum cassia (L.) J.Presl	tree	E	absence	0	presence	2
Arecaceae	Dypsis	Dypsis decaryi (Jum.) Beentje & J.Dransf.	tree	E	absence	0	presence	4
Euphorbiaceae	Aleurites	Aleurites moluccanus (L.) Willd.	tree	E	absence	0	presence	1
Myrtaceae	Syzygium	Syzygium nervosum A.Cunn. ex DC.	tree	E	absence	0	presence	1
Arecaceae	Washingtonia	Washingtonia filifera (Linden ex André) H.Wendl. ex de Bary	tree	E	absence	0	presence	6
Leguminosae	Acacia	Acacia confusa Merr.	tree	E	presence	4	presence	1
Apocynaceae	Alstonia	Alstonia scholaris (L.) R. Br.	tree	E	presence	1	presence	21
Leguminosae	Senna	Senna siamea (Lam.) H.S.Irwin & Barneby	tree	E	absence	0	presence	1
Arecaceae	Roystonea	Roystonea regia (Kunth) O.F.Cook	tree	E	presence	4	presence	32
Elaeocarpaceae	Muntingia	Muntingia calabura L.	tree	E	presence	1	presence	6
Myrtaceae	Eucalyptus	Eucalyptus tereticornis Sm.	tree	E	presence	2	absence	0
Euphorbiaceae	Hevea	Hevea brasiliensis (Willd. ex A.Juss.) Müll.Arg.	tree	E	presence	1	absence	0
Moraceae	Ficus	Ficus elastica Roxb. ex Hornem.	tree	E	absence	0	presence	4
Combretaceae	Terminalia	Terminalia boivinii Tul.	tree	E	presence	6	presence	19
Oxalidaceae	Averrhoa	Averrhoa carambola L.	tree	E	presence	3	presence	7
Myrtaceae	Syzygium	Syzygium samarangense (Blume) Merr. & L.M.Perry	tree	E	presence	3	presence	8
Sapotaceae	Mimusops	Mimusops elengi L.	tree	E	absence	0	presence	2
Arecaceae	Phoenix	Phoenix sylvestris (L.) Roxb.	tree	E	absence	0	presence	8
Leguminosae	Pterocarpus	Pterocarpus indicus Willd.	tree	E	presence	19	presence	78
Arecaceae	Elaeis	Elaeis guineensis Jacq.	tree	E	presence	5	presence	5
Verbenaceae	Tectona	Tectona grandis L.f.	tree	E	absence	0	presence	1
Rutaceae	Citrus	Citrus maxima (Burm.) Merr.	tree	E	presence	2	presence	5
Leguminosae	Albizia	Albizia saman (Jacq.) Merr.	tree	E	absence	0	presence	3
Cupressaceae	Juniperus	Juniperus chinensis L.	tree	E	absence	0	presence	3
Lauraceae	Cinnamomum	Cinnamomum camphora (L.) J.Presl	tree	E	absence	0	presence	6
Sapotaceae	Madhuca	Madhuca longifolia (J.Koenig ex L.) J.F.Macbr.	tree	E	absence	0	presence	1
Alangiaceae	Alangium	Alangium chinense (Lour.) Harms	tree	N	presence	2	absence	0
Euphorbiaceae	Mallotus	Mallotus paniculatus (Lam.) Müll.Arg.	tree	N	presence	2	absence	0
Lecythidaceae	Barringtonia	Barringtonia asiatica (L.) Kurz	tree	N	absence	0	presence	1
Anacardiaceae	Spondias	Spondias pinnata (L. f.) Kurz	tree	N	presence	1	absence	0
Lauraceae	Litsea	Litsea glutinosa (Lour.) C.B.Rob.	tree	N	presence	2	presence	3
Moraceae	Ficus	Ficus benjamina L.	tree	N	presence	4	presence	39
Leguminosae	Erythrina	Erythrina variegata L.	tree	N	absence	0	presence	3
Moraceae	Ficus	Ficus auriculata Lour.	tree	N	presence	1	absence	0
Dilleniaceae	Dillenia	Dillenia turbinata Finet & Gagnep.	tree	N	absence	0	presence	1
Apocynaceae	Wrightia	Wrightia pubescens R.Br.	tree	N	presence	2	presence	4
Arecaceae	Caryota	Caryota mitis Lour.	tree	N	absence	0	presence	2
Sterculiaceae	Pterospermum	Pterospermum heterophyllum Hance	tree	N	presence	1	absence	0
Arecaceae	Pritchardia	Pritchardia pacifica Seem. & H.Wendl.	tree	N	absence	0	presence	3
Moraceae	Ficus	Ficus altissima Blume	tree	N	presence	2	presence	17
Apocynaceae	Cerbera	Cerbera manghas L.	tree	N	presence	1	absence	0
Bignoniaceae	Radermachera	Radermachera hainanensis Merr.	tree	N	absence	0	presence	2
Flacourtiaceae	Casearia	Casearia aequilateralis Merr.	tree	N	presence	1	absence	0
Guttiferae	Calophyllum	Calophyllum inophyllum L.	tree	N	presence	1	presence	1
Anacardiaceae	Lannea	Lannea coromandelica (Houtt.) Merr.	tree	N	presence	6	absence	0
Moraceae	Ficus	Ficus virens Aiton	tree	N	presence	10	presence	22
Malvaceae	Hibiscus	Hibiscus tiliaceus L.	tree	N	presence	3	presence	5
Araliaceae	Heteropanax	Heteropanax fragrans (Roxb.) Seem.	tree	N	absence	0	presence	4
Sterculiaceae	Sterculia	Sterculia lanceolata Cav.	tree	N	absence	0	presence	3
Lauraceae	Litsea	Litsea monopetala (Roxb.) Pers.	tree	N	presence	1	absence	0
Ulmaceae	Celtis	Celtis timorensis Span.	tree	N	absence	0	presence	1
Leguminosae	Dalbergia	Dalbergia odorifera T.C.Chen	tree	N	absence	0	presence	6
Meliaceae	Melia	Melia azedarach L.	tree	N	presence	28	presence	21
Combretaceae	Terminalia	Terminalia catappa L.	tree	N	presence	4	presence	19
Meliaceae	Chukrasia	Chukrasia tabularis A.Juss.	tree	N	presence	1	presence	3
Flacourtiaceae	Homalium	Homalium ceylanicum (Gardner) Benth.	tree	N	absence	0	presence	5
Bombacaceae	Bombax	Bombax malabaricum DC.	tree	N	presence	2	presence	8
Myrtaceae	Syzygium	Syzygium jambos (L.) Alston	tree	N	absence	0	presence	3
Euphorbiaceae	Bischofia	Bischofia javanica Blume	tree	N	presence	2	presence	26
Verbenaceae	Vitex	Vitex quinata (Lour.) F.N.Williams	tree	N	absence	0	presence	1
Elaeocarpaceae	Elaeocarpus	Elaeocarpus hainanensis Oliv.	tree	N	presence	1	absence	0
Euphorbiaceae	Bridelia	Bridelia tomentosa Blume	tree	N	absence	0	presence	1
Euphorbiaceae	Triadica	Triadica sebifera (L.) Small	tree	N	presence	1	presence	1
Myrtaceae	Syzygium	Syzygium cumini (L.) Skeels	tree	N	presence	1	presence	4
Euphorbiaceae	Antidesma	Antidesma bunius (L.) Spreng.	tree	N	absence	0	presence	2
Annonaceae	Polyalthia	Polyalthia cerasoides (Roxb.) Bedd.	tree	N	presence	1	absence	0
Moraceae	Ficus	Ficus microcarpa L.f.	tree	N	presence	9	presence	35
Moraceae	Ficus	Ficus tinctoria subsp. gibbosa (Blume) Corner	tree	N	absence	0	presence	2
Arecaceae	Cocos	Cocos nucifera L.	tree	N	presence	18	presence	52
Anacardiaceae	Toxicodendron	Toxicodendron succedaneum (L.) Kuntze	tree	N	presence	1	absence	0
Arecaceae	Caryota	Caryota maxima Blume ex Mart.	tree	N	presence	4	presence	5
Podocarpaceae	Nageia	Nageia nagi (Thunb.) Kuntze	tree	N	absence	0	presence	1
Asparagaceae	Dracaena	Dracaena reflexa Lam.	shrub	E	absence	0	presence	2
Euphorbiaceae	Codiaeum	Codiaeum variegatum (L.) Rumph. ex A.Juss.	shrub	E	presence	4	presence	24
Malvaceae	Hibiscus	Hibiscus rosa-sinensis ‘Cooper'	shrub	E	presence	3	presence	10
Cupressaceae	Platycladus	Platycladus orientalis (L.) Franco	shrub	E	absence	0	presence	1
Leguminosae	Senna	Senna alata (L.) Roxb.	shrub	E	absence	0	presence	2
Malvaceae	Hibiscus	Hibiscus rosa-sinensis L.	shrub	E	presence	7	presence	44
Euphorbiaceae	Acalypha	Acalypha hispida Burm.f.	shrub	E	presence	1	absence	0
Apocynaceae	Tabernaemontana	Tabernaemontana divaricata (L.) R.Br. ex Roem. & Schult.	shrub	E	absence	0	presence	6
Leguminosae	Mimosa	Mimosa bimucronata (DC.) Kuntze	shrub	E	presence	3	absence	0
Oleaceae	Osmanthus	Osmanthus fragrans Lour.	shrub	E	absence	0	presence	3
Magnoliaceae	Magnolia	Magnolia figo (Lour.) DC.	shrub	E	absence	0	presence	1
Euphorbiaceae	Excoecaria	Excoecaria cochinchinensis Lour.	shrub	E	presence	1	presence	11
Pandanaceae	Pandanus	Pandanus utilis Bory	shrub	E	absence	0	presence	10
Myrtaceae	Eugenia	Eugenia uniflora L.	shrub	E	absence	0	presence	2
Hamamelidaceae	Loropetalum	Loropetalum chinense var. rubrum	shrub	E	absence	0	presence	8
Euphorbiaceae	Euphorbia	Euphorbia tithymaloides L.	shrub	E	presence	1	presence	1
Euphorbiaceae	Acalypha	Acalypha wilkesiana Müll.Arg.	shrub	E	presence	4	absence	0
Piperaceae	Piper	Piper nigrum L.	shrub	E	presence	1	absence	0
Rutaceae	Zanthoxylum	Zanthoxylum piperitum DC.	shrub	E	absence	0	presence	1
Euphorbiaceae	Euphorbia	Euphorbia milii var. splendens	shrub	E	absence	0	presence	1
Verbenaceae	Duranta	Duranta erecta ‘Variegata'	shrub	E	presence	5	presence	27
Apocynaceae	Allamanda	Allamanda schottii Pohl	shrub	E	absence	0	presence	6
Apocynaceae	Cascabela	Cascabela thevetia (L.) Lippold	shrub	E	absence	0	presence	2
Moraceae	Ficus	Ficus microcarpa ‘GoldenLeaves’	shrub	E	presence	8	presence	68
Verbenaceae	Duranta	Duranta repens ‘Variegata’	shrub	E	presence	1	presence	34
Apocynaceae	Nerium	Nerium oleander L.	shrub	E	absence	0	presence	3
Verbenaceae	Duranta	Duranta erecta L.	shrub	E	presence	1	presence	2
Asparagaceae	Agave	Agave sisalana Perrine	shrub	E	absence	0	presence	1
Acanthaceae	Sanchezia	Sanchezia oblonga Ruiz & Pav.	shrub	E	absence	0	presence	5
Moraceae	Ficus	Ficus deltoidea Jack	shrub	E	absence	0	presence	2
Oleaceae	Ligustrum	Ligustrum × vicaryi Rehder	shrub	E	absence	0	presence	1
Rubiaceae	Ixora	Ixora chinensis Lam.	shrub	E	presence	4	presence	66
Euphorbiaceae	Jatropha	Jatropha curcas L.	shrub	E	presence	2	presence	1
Verbenaceae	Lantana	Lantana camara L.	shrub	E	presence	19	presence	8
Verbenaceae	Lantana	Lantana montevidensis (Spreng.) Briq.	shrub	E	absence	0	presence	2
Leguminosae	Calliandra	Calliandra haematocephala Hassk.	shrub	E	absence	0	presence	12
Euphorbiaceae	Manihot	Manihot esculenta Crantz	shrub	E	presence	4	absence	0
Euphorbiaceae	Jatropha	Jatropha integerrima Jacq.	shrub	E	presence	2	presence	7
Arecaceae	Phoenix	Phoenix roebelenii O'Brien	shrub	E	absence	0	presence	5
Apocynaceae	Allamanda	Allamanda cathartica L.	shrub	E	presence	1	presence	2
Nyctaginaceae	Bougainvillea	Bougainvillea glabra Choisy	shrub	E	presence	10	presence	32
Arecaceae	Areca	Areca triandra Roxb. ex Buch.-Ham.	shrub	E	absence	0	presence	1
Arecaceae	Dypsis	Dypsis lutescens (H.Wendl.) Beentje & J.Dransf.	shrub	E	presence	3	presence	30
Moraceae	Morus	Morus alba L.	shrub	E	presence	2	presence	1
Turneraceae	Turnera	Turnera ulmifolia L.	shrub	E	absence	0	presence	1
Leguminosae	Senna	Senna bicapsularis (L.) Roxb.	shrub	E	absence	0	presence	2
Cycadaceae	Cycas	Cycas revoluta Thunb.	shrub	E	presence	2	presence	14
Rubiaceae	Hamelia	Hamelia patens Jacq.	shrub	E	absence	0	presence	8
Arecaceae	Pritchardia	Pritchardia martii (Gaudich.) H.Wendl.	shrub	E	absence	0	presence	1
Cactaceae	Opuntia	Opuntia dillenii (Ker Gawl.) Haw.	shrub	E	presence	1	absence	0
Asparagaceae	Dracaena	Dracaena fragrans (L.) Ker Gawl.	shrub	E	presence	1	presence	1
Asparagaceae	Yucca	Yucca gigantea Lem.	shrub	E	absence	0	presence	2
Araceae	Zamioculcas	Zamioculcas zamiifolia (Lodd.) Engl.	shrub	E	absence	0	presence	1
Leguminosae	Caesalpinia	Caesalpinia pulcherrima (L.) Sw.	shrub	E	presence	1	presence	2
Asclepiadaceae	Telosma	Telosma cordata (Burm. f.) Merr.	shrub	E	presence	1	absence	0
Solanaceae	Cestrum	Cestrum nocturnum L.	shrub	E	absence	0	presence	3
Leguminosae	Leucaena	Leucaena leucocephala (Lam.) de Wit	shrub	E	presence	1	presence	3
Acanthaceae	Thunbergia	Thunbergia erecta (Benth.) T.Anderson	shrub	E	absence	0	presence	5
Solanaceae	Brunfelsia	Brunfelsia brasiliensis (Spreng.) L.B.Sm. & Downs	shrub	E	absence	0	presence	1
Araliaceae	Polyscias	Polyscias scutellaria (Burm.f.) Fosberg	shrub	E	absence	0	presence	1
Moraceae	Ficus	Ficus microcarpa L. f. var. crassifolia	shrub	E	absence	0	presence	1
Asparagaceae	Cordyline	Cordyline fruticosa (L.) A.Chev.	shrub	E	absence	0	presence	28
Labiatae	Perilla	Perilla frutescens (L.) Britton	shrub	E	presence	2	absence	0
Lythraceae	Lagerstroemia	Lagerstroemia indica L.	shrub	E	absence	0	presence	7
Lythraceae	Cuphea	Cuphea bustamanta Lex.	shrub	E	presence	1	presence	6
Euphorbiaceae	Mallotus	Mallotus apelta (Lour.) Müll.Arg.	shrub	N	presence	1	absence	0
Euphorbiaceae	Flueggea	Flueggea virosa (Roxb. ex Willd.) Royle	shrub	N	presence	1	presence	3
Labiatae	Clerodendrum	Clerodendrum fortunatum L.	shrub	N	presence	1	absence	0
Euphorbiaceae	Claoxylon	Claoxylon indicum (Reinw. ex Blume) Hassk.	shrub	N	presence	1	absence	0
Myrtaceae	Syzygium	Syzygium claviflorum (Roxb.) Wall. ex A.M.Cowan & Cowan	shrub	N	presence	1	absence	0
Compositae	Xanthium	Xanthium strumarium L.	shrub	N	presence	1	absence	0
Goodeniaceae	Scaevola	Scaevola taccada (Gaertn.) Roxb.	shrub	N	absence	0	presence	2
Arecaceae	Phoenix	Phoenix loureiroi Kunth	shrub	N	presence	1	presence	3
Verbenaceae	Clerodendrum	Clerodendrum cyrtophyllum Turcz.	shrub	N	absence	0	presence	2
Malvaceae	Urena	Urena lobata L.	shrub	N	presence	2	absence	0
Verbenaceae	Callicarpa	Callicarpa formosana Rolfe	shrub	N	presence	1	absence	0
Moraceae	Ficus	Ficus hispida L.f.	shrub	N	presence	18	presence	11
Araliaceae	Schefflera	Schefflera arboricola (Hayata) Merr.	shrub	N	presence	3	presence	28
Boraginaceae	Ehretia	Ehretia microphylla Lam.	shrub	N	presence	9	presence	27
Sonneratiaceae	Sonneratia	Sonneratia caseolaris (L.) Engl.	shrub	N	absence	0	presence	1
Myrtaceae	Syzygium	Syzygium rehderianum Merr. & L.M.Perry	shrub	N	presence	1	presence	3
Moraceae	Ficus	Ficus variolosa Lindl. ex Benth.	shrub	N	absence	0	presence	1
Loganiaceae	Fagraea	Fagraea ceilanica Thunb.	shrub	N	presence	1	presence	8
Myrsinaceae	Maesa	Maesa perlarius (Lour.) Merr.	shrub	N	presence	1	absence	0
Solanaceae	Solanum	Solanum erianthum D. Don	shrub	N	presence	2	absence	0
Annonaceae	Desmos	Desmos chinensis Lour.	shrub	N	presence	2	absence	0
Rutaceae	Citrus	Citrus japonica Thunb.	shrub	N	presence	1	presence	7
Rubiaceae	Psychotria	Psychotria asiatica L.	shrub	N	presence	4	absence	0
Rutaceae	Murraya	Murraya paniculata (L.) Jack	shrub	N	presence	5	presence	19
Rutaceae	Atalantia	Atalantia buxifolia (Poir.) Oliv. ex Benth.	shrub	N	presence	2	absence	0
Compositae	Pluchea	Pluchea indica (L.) Less.	shrub	N	presence	1	presence	1
Rutaceae	Zanthoxylum	Zanthoxylum avicennae (Lam.) DC.	shrub	N	absence	0	presence	1
Verbenaceae	Lantana	Wikstroemia indica (L.) C.A. Mey.	shrub	N	presence	1	absence	0
Asparagaceae	Dracaena	Dracaena cambodiana Pierre ex Gagnep.	shrub	N	presence	2	presence	16
Pandanaceae	Pandanus	Pandanus tectorius Parkinson ex Du Roi	shrub	N	presence	12	presence	2
Ebenaceae	Diospyros	Diospyros strigosa Hemsl.	shrub	N	presence	1	absence	0
Meliaceae	Aglaia	Aglaia odorata Lour.	shrub	N	presence	5	presence	15
Rutaceae	Harrisonia	Harrisonia perforata (Blanco) Merr.	shrub	N	presence	1	absence	0
Tiliaceae	Microcos	Microcos paniculata L.	shrub	N	presence	1	absence	0
Oleaceae	Jasminum	Jasminum nervosum Lour.	shrub	N	presence	3	absence	0
Moraceae	Streblus	Streblus asper Lour.	shrub	N	presence	1	absence	0
Rutaceae	Evodia	Evodia lepta Merr.	shrub	N	presence	1	absence	0
Cannabaceae	Trema	Trema tomentosa (Roxb.) H. Hara	shrub	N	presence	2	absence	0
Annonaceae	Uvaria	Uvaria grandiflora Roxb. ex Hornem.	shrub	N	presence	1	absence	0
Proteaceae	Helicia	Helicia formosana Hemsl.	shrub	N	absence	0	presence	1
Rubiaceae	Catunaregam	Catunaregam spinosa (Thunb.) Tirveng.	shrub	N	presence	2	absence	0
Rosaceae	Rubus	Rubus cochinchinensis Tratt.	shrub	N	presence	2	absence	0
Leguminosae	Pongamia	Pongamia pinnata (L.) Pierre	shrub	N	presence	1	presence	1
Nyctaginaceae	Pisonia	Pisonia aculeata L.	shrub	N	presence	1	absence	0
Acanthaceae	Justicia	Justicia gendarussa Burm.f.	shrub	N	absence	0	presence	3
Euphorbiaceae	Phyllanthus	Phyllanthus reticulatus Poir.	shrub	N	presence	1	absence	0
Oleaceae	Ligustrum	Ligustrum sinense Lour.	shrub	N	absence	0	presence	2
Oleaceae	Ligustrum	Ligustrum quihoui Carrière	shrub	N	absence	0	presence	2
Labiatae	Volkameria	Volkameria inermis L.	shrub	N	presence	4	absence	0
Anacardiaceae	Rhus	Rhus chinensis Mill.	shrub	N	presence	2	absence	0
Moraceae	Streblus	Streblus ilicifolius (Vidal) Corner	shrub	N	presence	1	absence	0
Oleaceae	Jasminum	Jasminum longipetalum King & Gamble	shrub	N	presence	1	absence	0
Rubiaceae	Gardenia	Gardenia jasminoides J.Ellis	shrub	N	absence	0	presence	1
Annonaceae	Uvaria	Uvaria littoralis (Blume) Blume	shrub	N	presence	2	absence	0
Arecaceae	Rhapis	Rhapis excelsa (Thunb.) Henry	shrub	N	absence	0	presence	8
Leguminosae	Mimosa	Mimosa invisa Colla	herbaceous	E	presence	2	presence	4
Iridaceae	Neomarica	Neomarica gracilis (herbaceous.) Sprague	herbaceous	E	absence	0	presence	1
Musaceae	Musa	Musa basjoo Siebold & Zucc. ex Iinuma	herbaceous	E	absence	0	presence	1
Commelinaceae	Tradescantia	Tradescantia spathacea Sw.	herbaceous	E	absence	0	presence	1
Euphorbiaceae	Ricinus	Ricinus communis L.	herbaceous	E	presence	4	presence	3
Labiatae	Plectranthus	Plectranthus scutellarioides (L.) R.Br.	herbaceous	E	absence	0	presence	2
Araceae	Philodendron	Philodendron bipinnatifidum Schott ex Endl.	herbaceous	E	absence	0	presence	5
Amaranthaceae	Amaranthus	Amaranthus spinosus L.	herbaceous	E	presence	1	presence	1
Amaryllidaceae	Zephyranthes	Zephyranthes candida (Lindl.) herbaceous.	herbaceous	E	absence	0	presence	2
Brassicaceae	Brassica	Brassica rapa L.	herbaceous	E	presence	1	absence	0
Poaceae	Bambusa	Bambusa vulgaris ‘Wamin'	herbaceous	E	absence	0	presence	1
Portulacaceae	Portulaca	Portulaca grandiflora Hook.	herbaceous	E	absence	0	presence	1
Poaceae	Panicum	Panicum maximum Jacq.	herbaceous	E	absence	0	presence	7
Leguminosae	Macroptilium	Macroptilium lathyroides (L.) Urb.	herbaceous	E	presence	1	absence	0
Poaceae	Axonopus	Axonopus compressus (Sw.) P.Beauv.	herbaceous	E	presence	7	presence	16
Convolvulaceae	Ipomoea	Ipomoea batatas (L.) Lam.	herbaceous	E	presence	2	presence	1
Compositae	Chromolaena	Chromolaena odorata (L.) R.M.King & H.Rob.	herbaceous	E	presence	50	presence	8
Pontederiaceae	Eichhornia	Eichhornia crassipes (Mart.) Solms	herbaceous	E	presence	1	presence	2
Poaceae	Saccharum	Saccharum officinarum L.	herbaceous	E	presence	4	absence	0
Araceae	Monstera	Monstera deliciosa Liebm.	herbaceous	E	absence	0	presence	1
Compositae	Bidens	Bidens pilosa L.	herbaceous	E	presence	5	presence	11
Leguminosae	Mimosa	Mimosa pudica L.	herbaceous	E	presence	8	presence	14
Araceae	Syngonium	Syngonium podophyllum Schott	herbaceous	E	absence	0	presence	11
Polygonaceae	Reynoutria	Reynoutria multiflora (Thunb.) Moldenke	herbaceous	E	presence	1	absence	0
Nelumbonaceae	Nelumbo	Nelumbo nucifera Gaertn.	herbaceous	E	presence	4	absence	0
Strelitziaceae	Strelitzia	Strelitzia reginae Banks	herbaceous	E	presence	4	presence	15
Amaranthaceae	Alternanthera	Alternanthera ficoidea ‘Ruliginosa'	herbaceous	E	presence	2	presence	10
Asparagaceae	Sansevieria	Sansevieria trifasciata Prain	herbaceous	E	absence	0	presence	3
Urticaceae	Pilea	Pilea cadierei Gagnep. & Guillaumin	herbaceous	E	absence	0	presence	1
Zingiberaceae	Alpinia	Alpinia zerumbet ‘Variegata'	herbaceous	E	presence	1	presence	7
Poaceae	Bambusa	Bambusa vulgaris Schrad.	herbaceous	E	absence	0	presence	2
Euphorbiaceae	Euphorbia	Euphorbia antiquorum L.	herbaceous	E	absence	0	presence	1
Compositae	Ageratum	Ageratum conyzoides (L.) L.	herbaceous	E	absence	0	presence	3
Compositae	Praxelis	Praxelis clematidea (Griseb.) R.M.King & H.Rob.	herbaceous	E	presence	16	presence	4
Verbenaceae	Stachytarpheta	Stachytarpheta jamaicensis (L.) Vahl	herbaceous	E	presence	1	presence	2
Poaceae	Zoysia	Zoysia japonica Steud.	herbaceous	E	presence	23	presence	35
Asparagaceae	Agave	Agave americana var. variegata	herbaceous	E	presence	2	presence	12
Compositae	Synedrella	Synedrella nodiflora (L.) Gaertn.	herbaceous	E	absence	0	presence	5
Poaceae	Phyllostachys	Phyllostachys sulphurea (Carrière) Rivière & C.Rivière	herbaceous	E	presence	1	absence	0
Amaranthaceae	Alternanthera	Alternanthera bettzickiana (Regel) G.Nicholson	herbaceous	E	absence	0	presence	1
Leguminosae	Senna	Senna tora (L.) Roxb.	herbaceous	E	presence	1	presence	1
Convolvulaceae	Ipomoea	Ipomoea aquatica Forssk.	herbaceous	E	presence	1	presence	3
Amaranthaceae	Alternanthera	Alternanthera philoxeroides (Mart.) Griseb.	herbaceous	E	presence	2	presence	5
Cucurbitaceae	Momordica	Momordica charantia L.	herbaceous	E	presence	2	absence	0
Rubiaceae	Spermacoce	Spermacoce alata Aubl.	herbaceous	E	absence	0	presence	1
Solanaceae	Capsicum	Capsicum annuum L.	herbaceous	E	presence	1	absence	0
Verbenaceae	Clerodendrum	Clerodendrum thomsoniae Balf.f.	herbaceous	E	absence	0	presence	2
Strelitziaceae	Ravenala	Ravenala madagascariensis Sonn.	herbaceous	E	presence	1	presence	5
Leguminosae	Arachis	Arachis duranensis Krapov. & W.C.Greg.	herbaceous	E	absence	0	presence	2
Poaceae	Phyllostachys	Phyllostachys edulis (Carrière) J.Houz.	herbaceous	E	presence	4	absence	0
Cannaceae	Canna	Canna indica L.	herbaceous	E	absence	0	presence	1
Rubiaceae	Richardia	Richardia scabra L.	herbaceous	E	presence	3	presence	5
Cucurbitaceae	Cucurbita	Cucurbita moschata Duchesne	herbaceous	E	presence	1	absence	0
Convolvulaceae	Ipomoea	Ipomoea quamoclit L.	herbaceous	E	absence	0	presence	1
Poaceae	Indocalamus	Indocalamus tessellatus (Munro) Keng f.	herbaceous	E	absence	0	presence	1
Malvaceae	Malvastrum	Malvastrum coromandelianum (L.) Garcke	herbaceous	E	absence	0	presence	5
Labiatae	Hyptis	Hyptis suaveolens (L.) Poit.	herbaceous	E	absence	0	presence	5
Poaceae	Oryza	Oryza sativa L.	herbaceous	E	presence	19	absence	0
Amaryllidaceae	Hymenocallis	Hymenocallis littoralis (Jacq.) Salisb.	herbaceous	E	presence	4	presence	30
Nymphaeaceae	Nymphaea	Nymphaea tetragona Georgi	herbaceous	E	absence	0	presence	1
Begoniaceae	Begonia	Begonia cucullata Willd.	herbaceous	E	absence	0	presence	1
Leguminosae	Sesbania	Sesbania cannabina (Retz.) Pers.	herbaceous	E	presence	1	presence	8
Compositae	Mikania	Mikania micrantha Kunth	herbaceous	E	presence	1	absence	0
Amaryllidaceae	Crinum	Crinum asiaticum var. sinicum	herbaceous	E	absence	0	presence	1
Poaceae	Zoysia	Zoysia tenuifolia Thiele	herbaceous	E	absence	0	presence	68
Scrophulariaceae	Angelonia	Angelonia angustifolia Benth.	herbaceous	E	absence	0	presence	1
Umbelliferae	Coriandrum	Coriandrum sativum L.	herbaceous	E	absence	0	presence	1
Musaceae	Musa	Musa nana Lour.	herbaceous	E	presence	6	presence	2
Commelinaceae	Rhoeo	Tradescantia spathacea ‘Compacta'	herbaceous	E	presence	3	presence	12
Compositae	Erigeron	Erigeron canadensis L.	herbaceous	E	presence	6	presence	15
Poaceae	Bambusa	Bambusa tuldoides Munro	herbaceous	E	absence	0	presence	3
Urticaceae	Pilea	Pilea microphylla (L.) Liebm.	herbaceous	E	absence	0	presence	6
Poaceae	Bambusa	Bambusa multiplex (Lour.) Raeusch. ex Schult.	herbaceous	E	presence	1	presence	7
Heliconiaceae	Heliconia	Heliconia metallica Planch. & Linden ex Hook.	herbaceous	E	absence	0	presence	3
Euphorbiaceae	Euphorbia	Euphorbia cyathophora Murray	herbaceous	E	absence	0	presence	3
Liliaceae	Ophiopogon	Ophiopogon bodinieri H.Lév.	herbaceous	E	absence	0	presence	2
Amaranthaceae	Amaranthus	Amaranthus retroflexus L.	herbaceous	E	presence	1	presence	1
Liliaceae	Dianella	Dianella ensifolia ‘Slivery Stripe'	herbaceous	E	presence	1	presence	5
Liliaceae	Ophiopogon	Ophiopogon intermedius ‘Argenteo’	herbaceous	E	absence	0	presence	1
Amaranthaceae	Gomphrena	Gomphrena celosioides Mart.	herbaceous	E	absence	0	presence	2
Compositae	Parthenium	Parthenium hysterophorus L.	herbaceous	E	presence	5	presence	8
Poaceae	Zea	Zea mays L.	herbaceous	E	presence	2	absence	0
Poaceae	Poa	Poa annua L.	herbaceous	E	absence	0	presence	1
Compositae	Tridax	Tridax procumbens (L.) L.	herbaceous	E	absence	0	presence	5
Apocynaceae	Catharanthus	Catharanthus roseus (L.) G.Don	herbaceous	E	presence	2	presence	8
Capparaceae	Cleome	Cleome rutidosperma DC.	herbaceous	E	absence	0	presence	3
Amaryllidaceae	Hippeastrum	Hippeastrum striatum (Lam.) H.E.Moore	herbaceous	E	absence	0	presence	1
Marantaceae	Stromanthe	Stromanthe thalia (Vell.) J.M.A.Braga	herbaceous	E	absence	0	presence	1
Leguminosae	Macroptilium	Macroptilium atropurpureum (DC.) Urb.	herbaceous	E	absence	0	presence	2
Nyctaginaceae	Mirabilis	Mirabilis jalapa L.	herbaceous	E	absence	0	presence	1
Compositae	Aster	Aster subulatus (Michx.) Hort. ex Michx.	herbaceous	E	presence	5	presence	3
Rubiaceae	Oldenlandia	Oldenlandia diffusa (Willd.) Roxb.	herbaceous	N	absence	0	presence	6
Poaceae	Imperata	Imperata cylindrica (L.) Raeusch.	herbaceous	N	presence	6	presence	9
Poaceae	Saccharum	Saccharum arundinaceum Retz.	herbaceous	N	presence	9	presence	9
Adiantaceae	Adiantum	Adiantum caudatum L.	herbaceous	N	presence	1	absence	0
Cyperaceae	Cyperus	Cyperus compressus L.	herbaceous	N	presence	1	absence	0
Zingiberaceae	Alpinia	Alpinia katsumadai Hayata	herbaceous	N	absence	0	presence	2
Cleomaceae	Cleome	Cleome viscosa L.	herbaceous	N	presence	1	presence	1
Araceae	Pistia	Pistia stratiotes L.	herbaceous	N	presence	1	absence	0
Labiatae	Clinopodium	Clinopodium polycephalum (Vaniot) C.Y.Wu & S.J.Hsuan	herbaceous	N	absence	0	presence	1
Commelinaceae	Commelina	Commelina benghalensis L.	herbaceous	N	absence	0	presence	1
Euphorbiaceae	Euphorbia	Euphorbia hirta L.	herbaceous	N	absence	0	presence	7
Rubiaceae	Spermacoce	Spermacoce verticillata L.	herbaceous	N	absence	0	presence	16
Labiatae	Leucas	Leucas aspera (Willd.) Link	herbaceous	N	absence	0	presence	1
Pteridaceae	Pteris	Pteris cretica var. nervosa	herbaceous	N	absence	0	presence	1
Cyperaceae	Scleria	Scleria terrestris (L.) Fassett	herbaceous	N	presence	1	absence	0
Poaceae	Cyrtococcum	Cyrtococcum patens (L.) A.Camus	herbaceous	N	absence	0	presence	14
Poaceae	Cynodon	Cynodon dactylon (L.) Pers.	herbaceous	N	absence	0	presence	4
Poaceae	Echinochloa	Echinochloa colonum (Linn.) Link	herbaceous	N	presence	1	presence	1
Araceae	Scindapsus	Scindapsus maclurei (Merr.) Merr. & F.P.Metcalf	herbaceous	N	presence	2	absence	0
Araceae	Alocasia	Alocasia macrorrhiza (Linn.) Schott	herbaceous	N	presence	8	presence	22
Caryophyllaceae	Drymaria	Drymaria cordata (L.) Willd. ex Schult.	herbaceous	N	absence	0	presence	5
Poaceae	Melinis	Melinis repens (Willd.) Zizka	herbaceous	N	presence	1	presence	10
Euphorbiaceae	Euphorbia	Euphorbia thymifolia L.	herbaceous	N	absence	0	presence	2
Malvaceae	Sida	Sida acuta Burm.f.	herbaceous	N	presence	1	presence	4
Nyctaginaceae	Boerhavia	Boerhavia diffusa L.	herbaceous	N	absence	0	presence	2
Leguminosae	Tephrosia	Tephrosia purpurea (L.) Pers.	herbaceous	N	presence	2	absence	0
Polygonaceae	Polygonum	Polygonum chinense L.	herbaceous	N	absence	0	presence	1
Poaceae	Cenchrus	Cenchrus echinatus L.	herbaceous	N	absence	0	presence	1
Poaceae	Bambusa	Bambusa remotiflora (Kuntze) L.C.Chia & H.L.Fung	herbaceous	N	absence	0	presence	1
Piperaceae	Piper	Piper sarmentosum Roxb.	herbaceous	N	presence	1	presence	1
Scrophulariaceae	Lindernia	Lindernia ciliata (Colsm.) Pennell	herbaceous	N	presence	1	absence	0
Polygonaceae	Polygonum	Polygonum pubescens Blume	herbaceous	N	absence	0	presence	1
Scrophulariaceae	Lindernia	Lindernia crustacea (L.) F.Muell.	herbaceous	N	absence	0	presence	2
Umbelliferae	Centella	Centella asiatica (L.) Urb.	herbaceous	N	absence	0	presence	3
Compositae	Eclipta	Eclipta prostrata (L.) L.	herbaceous	N	absence	0	presence	1
Leguminosae	Alysicarpus	Alysicarpus vaginalis (L.) DC.	herbaceous	N	absence	0	presence	3
Poaceae	Paspalum	Paspalum conjugatum P.J.Bergius	herbaceous	N	presence	1	presence	4
Poaceae	Isachne	Isachne globosa (Thunb.) Kuntze	herbaceous	N	presence	3	absence	0
Poaceae	Dactyloctenium	Dactyloctenium aegyptium (L.) Willd.	herbaceous	N	presence	1	presence	6
Convolvulaceae	Ipomoea	Ipomoea pes-caprae (L.) R. Br.	herbaceous	N	presence	6	presence	1
Verbenaceae	Verbena	Verbena officinalis L.	herbaceous	N	absence	0	presence	1
Portulacaceae	Portulaca	Portulaca oleracea L.	herbaceous	N	presence	1	presence	4
Poaceae	Digitaria	Digitaria sanguinalis (L.) Scop.	herbaceous	N	absence	0	presence	14
Liliaceae	Ophiopogon	Ophiopogon japonicus (Thunb.) Ker Gawl.	herbaceous	N	absence	0	presence	2
Poaceae	Microstegium	Microstegium fasciculatum (L.) Henrard	herbaceous	N	presence	1	absence	0
Poaceae	Chloris	Chloris barbata Sw.	herbaceous	N	presence	3	presence	11
Malvaceae	Abutilon	Abutilon indicum (L.) Sweet	herbaceous	N	presence	2	presence	1
Aspleniaceae	Asplenium	Asplenium nidus L.	herbaceous	N	absence	0	presence	1
Poaceae	Eleusine	Eleusine indica (L.) Gaertn.	herbaceous	N	presence	8	presence	44
Compositae	Sphagneticola	Sphagneticola calendulacea (L.) Pruski	herbaceous	N	presence	15	presence	24
Amaranthaceae	Celosia	Celosia argentea L.	herbaceous	N	presence	2	presence	7
Cyperaceae	Bulbostylis	Bulbostylis barbata (Rottb.) C.B.Clarke	herbaceous	N	presence	1	absence	0
Euphorbiaceae	Acalypha	Acalypha indica L.	herbaceous	N	presence	1	presence	3
Leguminosae	Desmodium	Desmodium triflorum (L.) DC.	herbaceous	N	absence	0	presence	5
Liliaceae	Dianella	Dianella ensifolia (L.) DC.	herbaceous	N	absence	0	presence	1
Solanaceae	Solanum	Solanum americanum Mill.	herbaceous	N	absence	0	presence	1
Nephrolepidaceae	Nephrolepis	Nephrolepis auriculata Trimen	herbaceous	N	presence	1	presence	5
Poaceae	Digitaria	Digitaria ciliaris (Retz.) Koeler	herbaceous	N	presence	5	presence	4
Labiatae	Salvia	Salvia japonica Thunb.	herbaceous	N	presence	1	absence	0
Poaceae	Paspalum	Paspalum distichum L.	herbaceous	N	presence	1	absence	0
Cyperaceae	Kyllinga	Kyllinga brevifolia Rottb.	herbaceous	N	absence	0	presence	7
Poaceae	Imperata	Imperata cylindrica var. major (Nees) C.E.Hubb.	herbaceous	N	presence	2	absence	0
Cyperaceae	Cyperus	Cyperus iria L.	herbaceous	N	absence	0	presence	2
Euphorbiaceae	Acalypha	Acalypha australis L.	herbaceous	N	absence	0	presence	5
Amaranthaceae	Achyranthes	Achyranthes aspera L.	herbaceous	N	presence	2	presence	2
Leguminosae	Senna	Senna occidentalis (L.) Link	herbaceous	N	presence	1	absence	0
Cyperaceae	Cyperus	Cyperus rotundus L.	herbaceous	N	absence	0	presence	17
Phyllanthaceae	Phyllanthus	Phyllanthus niruri L.	herbaceous	N	absence	0	presence	4
Poaceae	Digitaria	Digitaria radicosa (J.Presl) Miq.	herbaceous	N	presence	1	absence	0
Convolvulaceae	Ipomoea	Ipomoea obscura (L.) Ker Gawl.	herbaceous	N	presence	1	absence	0
Commelinaceae	Commelina	Commelina communis L.	herbaceous	N	presence	2	presence	4
Scrophulariaceae	Lindernia	Lindernia anagallis (Burm.f.) Pennell	herbaceous	N	presence	2	absence	0
Araceae	Colocasia	Colocasia antiquorum Schott	herbaceous	N	absence	0	presence	1
Phyllanthaceae	Phyllanthus	Phyllanthus urinaria L.	herbaceous	N	absence	0	presence	16
Compositae	Cyanthillium	Cyanthillium cinereum (L.) H.Rob.	herbaceous	N	absence	0	presence	22
Compositae	Emilia	Emilia sonchifolia (L.) DC. ex DC.	herbaceous	N	absence	0	presence	1
Compositae	Erigeron	Erigeron annuus (L.) Pers.	herbaceous	N	presence	3	absence	0
Poaceae	Eriachne	Eriachne pallescens R.Br.	herbaceous	N	presence	1	absence	0
Leguminosae	Crotalaria	Crotalaria pallida Aiton	herbaceous	N	absence	0	presence	1
Commelinaceae	Commelina	Commelina diffusa Burm.f.	herbaceous	N	absence	0	presence	6
Poaceae	Chrysopogon	Chrysopogon aciculatus (Retz.) Trin.	herbaceous	N	absence	0	presence	11
Poaceae	Oplismenus	Oplismenus compositus (L.) P.Beauv.	herbaceous	N	absence	0	presence	3
Buddlejaceae	Buddleja	Buddleja lindleyana Fortune	herbaceous	N	absence	0	presence	1
Oxalidaceae	Oxalis	Oxalis corniculata L.	herbaceous	N	absence	0	presence	12
